# Supplementary material for: COVID-19 Vaccine Hesitancy in Australian Patients with Solid Organ Cancers
Source: MDPI journal article supplement (doi:10.3390/vaccines10091373), 2022-08-23
Supplement: s1 [file s1]

## **Supplementary Materials**

These supplementary materials have been provided by the authors to give readers additional information about their work.

Supplement to: **COVID-19 vaccine hesitancy in Australian patients with solid organ cancers.**

**List of CANcer patients' perspectives on coronavirus VACCination Survey (CANVACCS) Investigators:**

*Monash Health, Victoria:* Dr. Veronica Lopez Aedo, Dr. Elizabeth Ahern, Dr. Muhammad Alangeer, Dr. Nathan Bain, Dr. Amy Body, A/Prof. Peter Briggs, Dr. Daphne Day, Dr. Sophia Frentzas, Dr. Lisa Grech, A/Prof. Marion Harris, Dr. Gwo-Yaw Ho, Dr. Caroline Lum, Dr. Vi Luong, Dr. Amelia McCartney, Dr. Cameron McLaren, Dr. Mike Nguyen, Prof. Stephen Opat, A/Prof. David Pook, Prof. Eva Segelov, A/Prof. Andrew Strickland, Dr. Avraham Travers, Dr. Kate Webber, Dr. Michelle White, Dr. Walid Zwieky.

*Bendigo Health, Victoria:* Dr. Sam Harris.

*Latrobe Regional Hospital, Victoria:* Dr. Hieu Chau.

*Sunshine Coast Hospital and Health Service, Queensland:* A/Prof. Bryan Chan.

*Icon Cancer Centre Hobart, Tasmania:* A/Prof. Louise Nott.

*Central Coast Hematology, New South Wales:* Dr. Richard Blennerhassett, Dr. Cecily Forsyth, Ms. Jacqueline Jagger.

*St Vincent's Hospital Sydney, New South Wales:* A/Prof. Nada Hamad.

*Campbelltown Hospital, New South Wales:* Dr. Annette Tognela.

*Border Medical Oncology Research Unit, New South Wales:* A/Prof. Craig Underhill.

**Table S1.** Online survey questions

|                                                                                                                                                                                                                                               |                                                                                                                                                                                                                                                                                                                                                       |
|-----------------------------------------------------------------------------------------------------------------------------------------------------------------------------------------------------------------------------------------------|-------------------------------------------------------------------------------------------------------------------------------------------------------------------------------------------------------------------------------------------------------------------------------------------------------------------------------------------------------|
| <b>Screening items</b>                                                                                                                                                                                                                        |                                                                                                                                                                                                                                                                                                                                                       |
| Are you 18 years or older?                                                                                                                                                                                                                    | <input type="radio"/> Yes<br><input type="radio"/> No (Terminate if No)                                                                                                                                                                                                                                                                               |
| Have you received a cancer diagnosis?                                                                                                                                                                                                         | <input type="radio"/> Yes<br><input type="radio"/> No (Terminate if No)                                                                                                                                                                                                                                                                               |
| Are you a [participating site] patient?                                                                                                                                                                                                       | <input type="radio"/> Yes<br><input type="radio"/> No (Terminate if No)                                                                                                                                                                                                                                                                               |
| <b>Vaccination status</b>                                                                                                                                                                                                                     |                                                                                                                                                                                                                                                                                                                                                       |
| Have you already received a COVID-19 vaccine?                                                                                                                                                                                                 | <input type="radio"/> Yes, 1 dose only<br><input type="radio"/> Yes, 2 doses<br><input type="radio"/> No                                                                                                                                                                                                                                              |
| <b>Oxford COVID-19 Vaccine Hesitancy Scale</b>                                                                                                                                                                                                |                                                                                                                                                                                                                                                                                                                                                       |
| Instructions: We would like to know your feelings and thoughts about the COVID-19 vaccine. Note: If you have already been vaccinated against COVID-19, please complete these questions in relation to a future COVID-19 vaccine dose/booster. |                                                                                                                                                                                                                                                                                                                                                       |
| Would you take a COVID-19 vaccine if offered?                                                                                                                                                                                                 | <input type="radio"/> Definitely/have taken<br><input type="radio"/> Probably<br><input type="radio"/> I may or may not<br><input type="radio"/> Probably not<br><input type="radio"/> Definitely not<br><input type="radio"/> Don't know                                                                                                             |
| When a COVID-19 vaccine is available:                                                                                                                                                                                                         | <input type="radio"/> I will want to get it as soon as possible<br><input type="radio"/> I will take it when offered<br><input type="radio"/> I'm not sure what I will do<br><input type="radio"/> I will put off (delay) getting it<br><input type="radio"/> I will refuse to get it<br><input type="radio"/> Don't know                             |
| I would describe my attitude towards receiving a COVID-19 vaccine as:                                                                                                                                                                         | <input type="radio"/> Very keen<br><input type="radio"/> Pretty positive<br><input type="radio"/> Neutral<br><input type="radio"/> Quite uneasy<br><input type="radio"/> Against it<br><input type="radio"/> Don't know                                                                                                                               |
| If a COVID-19 vaccine was available in my local area, I would:                                                                                                                                                                                | <input type="radio"/> Get it as soon as possible<br><input type="radio"/> Get it when I have time<br><input type="radio"/> Delay getting it<br><input type="radio"/> Avoid getting it for as long as possible<br><input type="radio"/> Never get it<br><input type="radio"/> Don't know                                                               |
| If my family or friends were thinking of getting a COVID-19 vaccination, I would:                                                                                                                                                             | <input type="radio"/> Strongly encourage them<br><input type="radio"/> Encourage them<br><input type="radio"/> Not say anything to them about it<br><input type="radio"/> Ask them to delay getting the vaccination<br><input type="radio"/> Suggest that they do not get the vaccination<br><input type="radio"/> Don't know                         |
| I would describe myself as:                                                                                                                                                                                                                   | <input type="radio"/> Eager to get a COVID-19 vaccine<br><input type="radio"/> Willing to get the COVID-19 vaccine<br><input type="radio"/> Not bothered about getting the COVID-19 vaccine<br><input type="radio"/> Unwilling to get the COVID-19 vaccine<br><input type="radio"/> Anti-vaccination for COVID-19<br><input type="radio"/> Don't know |
| Taking a COVID-19 vaccination is:                                                                                                                                                                                                             | <input type="radio"/> Really important<br><input type="radio"/> Important<br><input type="radio"/> Neither important nor unimportant<br><input type="radio"/> Unimportant<br><input type="radio"/> Really unimportant<br><input type="radio"/> Don't know                                                                                             |
| <b>Oxford COVID-19 Vaccine Confidence and Complacency Scale</b>                                                                                                                                                                               |                                                                                                                                                                                                                                                                                                                                                       |
| Do you think you will be infected with COVID-19 over the next 12 months?                                                                                                                                                                      | <input type="radio"/> Definitely<br><input type="radio"/> Probably<br><input type="radio"/> Possibly                                                                                                                                                                                                                                                  |

|                                                                              |                                                                                                                                                                                                                                                                                                                                                   |
|------------------------------------------------------------------------------|---------------------------------------------------------------------------------------------------------------------------------------------------------------------------------------------------------------------------------------------------------------------------------------------------------------------------------------------------|
|                                                                              | <ul style="list-style-type: none"> <li>o Probably not</li> <li>o Definitely not</li> <li>o Don't know</li> </ul>                                                                                                                                                                                                                                  |
| I think the COVID-19 vaccine is likely to:                                   | <ul style="list-style-type: none"> <li>o Work for almost everyone</li> <li>o Work for most people</li> <li>o I am unsure how many people it will work for</li> <li>o Not work for most people</li> <li>o Not work for anyone</li> <li>o Don't know</li> </ul>                                                                                     |
| I think the COVID-19 vaccine is likely to:                                   | <ul style="list-style-type: none"> <li>o Definitely work for me</li> <li>o Probably work for me</li> <li>o May or may not work for me</li> <li>o Probably not work for me</li> <li>o Definitely not work for me</li> <li>o Don't know</li> </ul>                                                                                                  |
| I think if I get the COVID-19 vaccine it will be:                            | <ul style="list-style-type: none"> <li>o Really helpful for the community around me</li> <li>o Helpful for the community around me</li> <li>o Neither helpful nor unhelpful for the community around me</li> <li>o Unhelpful for the community around me</li> <li>o Really unhelpful for the community around me</li> <li>o Don't know</li> </ul> |
| I think if individuals like me get the COVID-19 vaccine it will:             | <ul style="list-style-type: none"> <li>o Save a large number of lives</li> <li>o Save some lives</li> <li>o Have no impact</li> <li>o Lead to more deaths</li> <li>o Lead to a large number of deaths</li> <li>o Don't know</li> </ul>                                                                                                            |
| I think the speed of developing and testing the vaccine means it will be:    | <ul style="list-style-type: none"> <li>o Really good</li> <li>o Good</li> <li>o Will not affect how good or bad it is</li> <li>o Bad</li> <li>o Really bad</li> <li>o Don't know</li> </ul>                                                                                                                                                       |
| I think the speed of developing and testing the vaccine means it will be:    | <ul style="list-style-type: none"> <li>o Really safe</li> <li>o Safe</li> <li>o It will not affect how safe it is</li> <li>o Unsafe</li> <li>o Really unsafe</li> <li>o Don't know</li> </ul>                                                                                                                                                     |
| I think if many people do not get the vaccine this:                          | <ul style="list-style-type: none"> <li>o Will be dangerous</li> <li>o May be dangerous</li> <li>o Will have no consequences at all</li> <li>o May be good</li> <li>o Will be good</li> <li>o Don't know</li> </ul>                                                                                                                                |
| I expect that receiving the vaccine will be:                                 | <ul style="list-style-type: none"> <li>o Hardly noticeable</li> <li>o A little unpleasant</li> <li>o Moderately unpleasant</li> <li>o Painful</li> <li>o Extremely painful</li> <li>o Don't know</li> </ul>                                                                                                                                       |
| I think the side-effects for people of getting the COVID-19 vaccine will be: | <ul style="list-style-type: none"> <li>o None</li> <li>o Mild</li> <li>o Moderate</li> <li>o Significant</li> <li>o Life-threatening</li> <li>o Don't know</li> </ul>                                                                                                                                                                             |
| I think the COVID-19 vaccine will:                                           | <ul style="list-style-type: none"> <li>o Greatly strengthen my immune system</li> <li>o Strengthen my immune system</li> <li>o It will neither strengthen nor weaken my immune system</li> <li>o Weaken my immune system</li> <li>o Greatly weaken my immune system</li> <li>o Don't know</li> </ul>                                              |

|                                                                                                                                                                                                                                                                                                                                                                                                          |                                                                                                                                                                                                                                                                                                                                                                                |
|----------------------------------------------------------------------------------------------------------------------------------------------------------------------------------------------------------------------------------------------------------------------------------------------------------------------------------------------------------------------------------------------------------|--------------------------------------------------------------------------------------------------------------------------------------------------------------------------------------------------------------------------------------------------------------------------------------------------------------------------------------------------------------------------------|
| I think taking the COVID-19 vaccine:                                                                                                                                                                                                                                                                                                                                                                     | <input type="radio"/> Will give me complete freedom to get on with life just as before<br><input type="radio"/> Will give me greater freedom<br><input type="radio"/> Will have no effect on my freedom<br><input type="radio"/> Will restrict my freedom<br><input type="radio"/> Will completely restrict my freedom to get on with life<br><input type="radio"/> Don't know |
| I think getting the vaccine is a sign of:                                                                                                                                                                                                                                                                                                                                                                | <input type="radio"/> Great personal strength<br><input type="radio"/> Personal strength<br><input type="radio"/> Not a sign of personal strength or weakness<br><input type="radio"/> Personal weakness<br><input type="radio"/> Great personal weakness<br><input type="radio"/> Don't know                                                                                  |
| Taking a new COVID-19 vaccine will make me feel like a guinea pig:                                                                                                                                                                                                                                                                                                                                       | <input type="radio"/> Do not agree<br><input type="radio"/> Agree a little<br><input type="radio"/> Agree moderately<br><input type="radio"/> Agree a lot<br><input type="radio"/> Completely agree<br><input type="radio"/> Don't know                                                                                                                                        |
| <b>Disease Influenced Vaccine Acceptance Scale-Six</b><br><br>Instructions: We would like to know about how your cancer diagnosis may be related to your feelings and thoughts about the COVID-19 vaccine. For each of the following statements, please tap/click the one choice that best represents how strongly you agree or disagree with it. There are 6 choices to choose from for each statement. |                                                                                                                                                                                                                                                                                                                                                                                |
| My history of cancer makes me more worried about being infected with COVID-19:                                                                                                                                                                                                                                                                                                                           | <input type="radio"/> Strongly agree<br><input type="radio"/> Somewhat agree<br><input type="radio"/> Neither disagree nor agree<br><input type="radio"/> Somewhat disagree<br><input type="radio"/> Strongly disagree<br><input type="radio"/> Don't know                                                                                                                     |
| My history of cancer means having the vaccine is more important to me:                                                                                                                                                                                                                                                                                                                                   | <input type="radio"/> Strongly agree<br><input type="radio"/> Somewhat agree<br><input type="radio"/> Neither disagree nor agree<br><input type="radio"/> Somewhat disagree<br><input type="radio"/> Strongly disagree<br><input type="radio"/> Don't know                                                                                                                     |
| My doctor's recommendation regarding the vaccine is important to me:                                                                                                                                                                                                                                                                                                                                     | <input type="radio"/> Strongly agree<br><input type="radio"/> Somewhat agree<br><input type="radio"/> Neither disagree nor agree<br><input type="radio"/> Somewhat disagree<br><input type="radio"/> Strongly disagree<br><input type="radio"/> Don't know                                                                                                                     |
| My history of cancer makes me worried about how well the vaccine will work for me:                                                                                                                                                                                                                                                                                                                       | <input type="radio"/> Strongly disagree<br><input type="radio"/> Somewhat disagree<br><input type="radio"/> Neither disagree nor agree<br><input type="radio"/> Somewhat agree<br><input type="radio"/> Strongly agree<br><input type="radio"/> Don't know                                                                                                                     |
| My history of cancer makes me worried about how the vaccine will affect me:                                                                                                                                                                                                                                                                                                                              | <input type="radio"/> Strongly disagree<br><input type="radio"/> Somewhat disagree<br><input type="radio"/> Neither disagree nor agree<br><input type="radio"/> Somewhat agree<br><input type="radio"/> Strongly agree<br><input type="radio"/> Don't know                                                                                                                     |
| I am worried about how the vaccine will affect my cancer treatment:                                                                                                                                                                                                                                                                                                                                      | <input type="radio"/> Strongly disagree<br><input type="radio"/> Somewhat disagree<br><input type="radio"/> Neither disagree nor agree<br><input type="radio"/> Somewhat agree<br><input type="radio"/> Strongly agree<br><input type="radio"/> Don't know                                                                                                                     |
| <b>Clinical</b>                                                                                                                                                                                                                                                                                                                                                                                          |                                                                                                                                                                                                                                                                                                                                                                                |
| What type of cancer do you have? (i.e. where your cancer started and not where it has spread to).                                                                                                                                                                                                                                                                                                        | <input type="radio"/> Breast<br><input type="radio"/> Lung (including mesothelioma)<br><input type="radio"/> Genitourinary (i.e. prostate, kidney, testicular or bladder)<br><input type="radio"/> Skin (including melanoma)                                                                                                                                                   |

|                                                                                                                                                                                              |                                                                                                                                                                                                                                                                                                                                                                                                                                                       |
|----------------------------------------------------------------------------------------------------------------------------------------------------------------------------------------------|-------------------------------------------------------------------------------------------------------------------------------------------------------------------------------------------------------------------------------------------------------------------------------------------------------------------------------------------------------------------------------------------------------------------------------------------------------|
|                                                                                                                                                                                              | <input type="radio"/> Gastrointestinal (i.e. stomach, esophagus, bile duct, gallbladder, pancreas, colon, rectum, or anus)<br><input type="radio"/> Gynecological (i.e. ovarian, cervical, uterine or vulvar/vaginal)<br><input type="radio"/> Head and neck (i.e. mouth, throat, sinus or nose)<br><input type="radio"/> Brain<br><input type="radio"/> Blood (i.e. leukemia, myeloma and lymphoma)<br><input type="radio"/> Other (please specify): |
| When was your cancer diagnosed?                                                                                                                                                              | <input type="radio"/> Less than 6 months ago<br><input type="radio"/> 6 to 24 months ago<br><input type="radio"/> 2 to 5 years ago<br><input type="radio"/> More than 5 years ago                                                                                                                                                                                                                                                                     |
| As you understand it, is your cancer in just the one area where it started (localized) or has it spread to other places in the body (metastatic)?                                            | <input type="radio"/> Localized<br><input type="radio"/> Metastatic<br><input type="radio"/> Don't know<br><input type="radio"/> Other (please type any comments: )                                                                                                                                                                                                                                                                                   |
| Are you currently on cancer treatment?                                                                                                                                                       | <input type="radio"/> Yes<br><input type="radio"/> No                                                                                                                                                                                                                                                                                                                                                                                                 |
| How long ago was your last treatment? (e.g. chemotherapy, immunotherapy, hormonal treatment, targeted therapy, radiotherapy and/or clinical trial).                                          | <input type="radio"/> Currently on treatment<br><input type="radio"/> Less than 1 year ago<br><input type="radio"/> 1 to 5 years ago<br><input type="radio"/> More than 5 years ago                                                                                                                                                                                                                                                                   |
| Socio-demographics                                                                                                                                                                           |                                                                                                                                                                                                                                                                                                                                                                                                                                                       |
| What is your gender?                                                                                                                                                                         | <input type="radio"/> Male<br><input type="radio"/> Female<br><input type="radio"/> Non-binary /third gender<br><input type="radio"/> Prefer not to say                                                                                                                                                                                                                                                                                               |
| What is your age?                                                                                                                                                                            | _____                                                                                                                                                                                                                                                                                                                                                                                                                                                 |
| What is your highest educational level (completed)?                                                                                                                                          | <input type="radio"/> No formal education<br><input type="radio"/> Primary education<br><input type="radio"/> Secondary education<br><input type="radio"/> Vocational/trade qualification<br><input type="radio"/> University education or higher degree<br><input type="radio"/> Other (please specify):                                                                                                                                             |
| What is your annual household income (including everyone who lives in your home)?                                                                                                            | <input type="radio"/> Less than \$50,000<br><input type="radio"/> \$50,001 to \$100,000<br><input type="radio"/> \$100,001 to \$150,000<br><input type="radio"/> More than \$150,000<br><input type="radio"/> Prefer not to say                                                                                                                                                                                                                       |
| Do you identify as Aboriginal and/or Torres Strait Islander?                                                                                                                                 | <input type="radio"/> Yes<br><input type="radio"/> No<br><input type="radio"/> Prefer not to say                                                                                                                                                                                                                                                                                                                                                      |
| Is English your first language?                                                                                                                                                              | <input type="radio"/> Yes<br><input type="radio"/> No                                                                                                                                                                                                                                                                                                                                                                                                 |
| Please include any comments about your feelings and thoughts about your cancer and COVID-19 vaccination that you would like to share. If you have no comments to include, please type 'Nil'. | [Text entry]:<br>_____                                                                                                                                                                                                                                                                                                                                                                                                                                |

**Table S2.** Logistic regression analysis predicting vaccinated status with sociodemographic and clinical characteristics.

| Category (reference)                                                           | n    | B (SE)       | Odds ratio (95% CI) | p-value |
|--------------------------------------------------------------------------------|------|--------------|---------------------|---------|
| <b>Gender (Male)</b>                                                           | 2675 |              |                     |         |
| Female                                                                         |      | -0.26 (0.11) | 0.77 (0.63 – 0.95)  | 0.01    |
| <b>Age (18–49 years)</b>                                                       | 2684 |              |                     |         |
| 50–69                                                                          |      | 0.43 (0.13)  | 1.53 (1.18 – 1.99)  | 0.002   |
| ≥70                                                                            |      | 1.27 (0.16)  | 3.56 (2.58 – 4.91)  | <0.001  |
| <b>Highest level of education (No formal /primary school/secondary school)</b> | 2679 |              |                     |         |
| Vocational/Trade                                                               |      | -0.20 (0.13) | 0.82 (0.64 – 1.06)  | 0.13    |
| University                                                                     |      | 0.15 (0.12)  | 1.16 (0.92 – 1.47)  | 0.21    |
| <b>Annual household income (AUD&lt;50K)</b>                                    | 2687 |              |                     |         |
| 50K–100K                                                                       |      | 0.30 (0.14)  | 1.35 (1.03 – 1.76)  | 0.03    |
| 100K–150K                                                                      |      | -0.06 (0.16) | 0.94 (0.69 – 1.29)  | 0.70    |
| >150K                                                                          |      | 0.26 (0.20)  | 1.30 (0.88 – 1.93)  | 0.19    |
| Prefer not to say                                                              |      | -0.15 (0.14) | 0.86 (0.65 – 1.14)  | 0.29    |
| <b>English as dominant language (Yes)</b>                                      | 2686 |              |                     |         |
| No                                                                             |      | -0.37 (0.16) | 0.69 (0.51 – 0.93)  | 0.02    |
| <b>Location (Metropolitan)</b>                                                 | 2687 |              |                     |         |
| Regional/rural                                                                 |      | -0.43 (0.10) | 0.65 (0.53 – 0.80)  | <0.001  |
| <b>Cancer Type (All other cancer types – pooled)</b>                           | 2687 |              |                     |         |
| Breast                                                                         |      | 0.09 (0.11)  | 1.09 (0.88 – 1.35)  | 0.42    |
| Genitourinary                                                                  |      | 0.40 (0.14)  | 1.49 (1.13 – 1.97)  | 0.005   |
| Gastrointestinal                                                               |      | -0.17 (0.13) | 0.84 (0.66 – 1.08)  | 0.17    |
| Lung                                                                           |      | 0.02 (0.17)  | 1.02 (0.73 – 1.42)  | 0.92    |
| Skin                                                                           |      | -0.14 (0.23) | 0.87 (0.55 – 1.37)  | 0.55    |
| Gynecological                                                                  |      | -0.23 (0.21) | 0.79 (0.53 – 1.18)  | 0.26    |
| Head and Neck                                                                  |      | -0.48 (0.24) | 0.62 (0.39 – 0.98)  | 0.04    |
| Other                                                                          |      | -0.27 (0.29) | 0.77 (0.44 – 1.35)  | 0.36    |
| <b>Cancer Stage (Localized)</b>                                                | 2560 |              |                     |         |
| Metastatic                                                                     |      | 0.004 (0.11) | 1.00 (0.81 – 1.24)  | 0.97    |
| <b>Time since diagnosis (&lt;6 months)</b>                                     | 2687 |              |                     |         |
| 6–24 months                                                                    |      | 0.48 (0.15)  | 1.62 (1.22 – 2.15)  | 0.001   |
| 2–5 years                                                                      |      | 0.67 (0.15)  | 1.96 (1.45 – 2.65)  | <0.001  |
| >5 years                                                                       |      | 0.95 (0.18)  | 2.59 (1.82 – 3.68)  | <0.001  |
| <b>Current anti-cancer treatment (Yes)</b>                                     | 2687 |              |                     |         |
| No                                                                             |      | 0.14 (0.10)  | 1.15 (0.94 – 1.40)  | 0.18    |

**Notes:** Regression analyses was controlled for time since study commencement. These variables were excluded due to <50 responses; Aboriginal and/or Torres Strait Islander status; non-binary/other gender, and “other” educational level. Cancer stage (don’t know/other) were excluded for comparisons between localized and metastatic. Abbreviations: B, unstandardized coefficient; SE, standard error; 95% CI, 95% confidence interval; AUD, Australian Dollars; K, 1000.

**Table S3.** Hierarchical multivariable logistic regression analysis of vaccinated status, with significantly correlated ( $r>0.1$ ) demographic and clinical variables (cancer type not included) ( $n = 2684$ ).

|                                      | B     | SE    | Wald   | df | p-value | OR   | 95% CI |       |
|--------------------------------------|-------|-------|--------|----|---------|------|--------|-------|
|                                      |       |       |        |    |         |      | Lower  | Upper |
| <b>Time since study commencement</b> | 0.03  | 0.002 | 205.10 | 1  | <0.001  | 1.03 | 1.03   | 1.04  |
| <b>Age (years)</b>                   |       |       |        |    |         |      |        |       |
| 18–49 (reference)                    | -     | -     | -      | -  | -       | -    | -      | -     |
| 50–69                                | 0.44  | 0.14  | 10.39  | 1  | 0.001   | 1.55 | 1.19   | 2.02  |
| ≥70                                  | 1.27  | 0.17  | 58.07  | 1  | <0.001  | 3.56 | 2.57   | 4.94  |
| <b>Location</b>                      |       |       |        |    |         |      |        |       |
| Metropolitan (reference)             | -     | -     | -      | -  | -       | -    | -      | -     |
| Regional/rural                       | -0.47 | 0.11  | 19.54  | 1  | <0.001  | 0.62 | 0.51   | 0.77  |
| <b>Time since diagnosis</b>          |       |       |        |    |         |      |        |       |
| <6 months (reference)                | -     | -     | -      | -  | -       | -    | -      | -     |
| 6–24 months                          | 0.50  | 0.15  | 11.29  | 1  | 0.001   | 1.65 | 1.23   | 2.20  |
| 2–5 years                            | 0.69  | 0.16  | 19.67  | 1  | <0.001  | 2.00 | 1.47   | 2.72  |
| >5 years                             | 0.83  | 0.18  | 20.43  | 1  | <0.001  | 2.29 | 1.60   | 3.28  |
| Constant                             | -1.03 | 0.19  | 30.61  | 1  | <0.001  | 0.36 |        |       |

**Notes:** Variables entered at each step: Step 1, time since study commencement; Step 2, age and location; Step 3, time since diagnosis. Variables significantly correlated ( $r>0.1$ ) with vaccinated status: age, location, time since diagnosis.

Abbreviations: B, unstandardized coefficient; SE, standard error; df, degrees of freedom; OR, odds ratio; 95% CI, 95% confidence interval.

**Table S4.** Hierarchical multivariable logistic regression analysis of vaccinated status with genitourinary cancer type, compared with all other cancer types, controlling for significantly correlated ( $r>0.1$ ) demographic and disease-related variables with either vaccinated status or genitourinary cancer type (when compared with all other cancer types) ( $n = 2545$ ).

|                                      | <b>B</b> | <b>SE</b> | <b>Wald</b> | <b>df</b> | <b>p-value</b> | <b>OR</b> | <b>95% CI</b> |              |
|--------------------------------------|----------|-----------|-------------|-----------|----------------|-----------|---------------|--------------|
|                                      |          |           |             |           |                |           | <b>Lower</b>  | <b>Upper</b> |
| <b>Time since study commencement</b> | 0.03     | 0.002     | 185.25      | 1         | <0.001         | 1.03      | 1.03          | 1.04         |
| <b>Age (years)</b>                   |          |           |             |           |                |           |               |              |
| 18–49 (reference)                    | -        | -         | -           | -         | -              | -         | -             | -            |
| 50–69                                | 0.46     | 0.14      | 10.37       | 1         | 0.001          | 1.58      | 1.20          | 2.08         |
| ≥70                                  | 1.27     | 0.18      | 50.77       | 1         | <0.001         | 3.57      | 2.51          | 5.06         |
| <b>Location</b>                      |          |           |             |           |                |           |               |              |
| Metropolitan (reference)             | -        | -         | -           | -         | -              | -         | -             | -            |
| Regional/rural                       | -0.51    | 0.11      | 20.95       | 1         | <0.001         | 0.60      | 0.48          | 0.75         |
| <b>Gender</b>                        |          |           |             |           |                |           |               |              |
| Male (reference)                     | -        | -         | -           | -         | -              | -         | -             | -            |
| Female                               | -0.06    | 0.13      | 0.23        | 1         | 0.63           | 0.94      | 0.73          | 1.21         |
| <b>Genitourinary cancer type</b>     | 0.06     | 0.18      | 0.11        | 1         | 0.74           | 1.06      | 0.75          | 1.50         |
| <b>Time since diagnosis</b>          |          |           |             |           |                |           |               |              |
| <6 months (reference)                | -        | -         | -           | -         | -              | -         | -             | -            |
| 6–24 months                          | 0.45     | 0.18      | 8.46        | 1         | 0.004          | 1.57      | 1.16          | 2.13         |
| 2–5 years                            | 0.63     | 0.16      | 14.84       | 1         | <0.001         | 1.87      | 1.36          | 2.58         |
| >5 years                             | 0.76     | 0.19      | 15.10       | 1         | <0.001         | 2.13      | 1.45          | 3.11         |
| <b>Cancer stage</b>                  |          |           |             |           |                |           |               |              |
| Localized (reference)                | -        | -         | -           | -         | -              | -         | -             | -            |
| Metastatic                           | -0.15    | 0.12      | 1.59        | 1         | 0.21           | 0.87      | 0.69          | 1.08         |
| Constant                             | -0.84    | 0.22      | 14.08       | 1         | <0.001         | 0.43      |               |              |

**Notes:** Variables entered into the model at each step: Step 1, time since study commencement; Step 2, age, location, gender; Step 3, genitourinary cancer type, time since diagnosis, cancer stage. Variables significantly correlated ( $r>0.1$ ) with vaccinated status: age, location, time since diagnosis. Variables significantly correlated ( $r>0.1$ ) with genitourinary cancer type: age, gender, time since diagnosis, cancer stage. Variable categories excluded from analysis: Non-binary/prefer not to say (gender); don't know/not applicable/other (cancer stage). Abbreviations: B, unstandardized coefficient; SE, standard error; df, degrees of freedom; OR, odds ratio; 95% CI, 95% confidence interval.

**Table S5.** Hierarchical multivariable logistic regression analysis of vaccinated status with head and neck cancer, compared with all other cancer types, controlling for significantly correlated ( $r>0.1$ ) demographic and disease-related variables with either vaccinated status or head and neck cancer type (when compared with all other cancer types) ( $n = 2545$ ).

|                                      | B     | SE    | Wald   | df | p-value | OR   | OR 95% CI |       |
|--------------------------------------|-------|-------|--------|----|---------|------|-----------|-------|
|                                      |       |       |        |    |         |      | Lower     | Upper |
| <b>Time since study commencement</b> | 0.03  | 0.002 | 203.88 | 1  | <0.001  | 1.03 | 1.03      | 1.04  |
| <b>Age (years)</b>                   |       |       |        |    |         |      |           |       |
| 18–49 (reference)                    | -     | -     | -      | -  | -       | -    | -         | -     |
| 50–69                                | 0.43  | 0.14  | 9.53   | 1  | 0.002   | 1.53 | 1.17      | 2.00  |
| ≥70                                  | 1.23  | 0.17  | 51.77  | 1  | <0.001  | 3.44 | 2.45      | 4.81  |
| <b>Location</b>                      |       |       |        |    |         |      |           |       |
| Metropolitan (reference)             | -     | -     | -      | -  | -       | -    | -         | -     |
| Regional/rural                       | -0.48 | 0.11  | 19.60  | 1  | <0.001  | 0.62 | 0.50      | 0.77  |
| <b>Gender</b>                        |       |       |        |    |         |      |           |       |
| Male (reference)                     | -     | -     | -      | -  | -       | -    | -         | -     |
| Female                               | -0.09 | 0.11  | 0.65   | 1  | 0.42    | 0.91 | 0.73      | 1.14  |
| <b>Head and neck cancer type</b>     | -0.47 | 0.25  | 3.56   | 1  | 0.059   | 0.63 | 0.39      | 1.02  |
| <b>Time since diagnosis</b>          |       |       |        |    |         |      |           |       |
| <6 months (reference)                | -     | -     | -      | -  | -       | -    | -         | -     |
| 6–24 months                          | 0.45  | 0.15  | 8.76   | 1  | 0.003   | 1.56 | 1.16      | 2.10  |
| 2–5 years                            | 0.64  | 0.16  | 16.15  | 1  | <0.001  | 1.90 | 1.39      | 2.60  |
| >5 years                             | 0.81  | 0.19  | 19.10  | 1  | <0.001  | 2.25 | 1.56      | 3.24  |
| <b>Current anti-cancer treatment</b> |       |       |        |    |         |      |           |       |
| Yes (reference)                      | -     | -     | -      | -  | -       | -    | -         | -     |
| No                                   | 0.11  | 0.11  | 1.07   | 1  | 0.30    | 1.12 | 0.90      | 1.39  |
| Constant                             | -0.95 | 0.21  | 20.93  | 1  | <0.001  | 0.39 |           |       |

**Notes:** Variables entered into the model at each step: 1, time since study commencement; Step 2, age, location, gender; Step 3, head and neck cancer, time since diagnosis, current anti-cancer treatment. Variables significantly correlated with vaccinated status with  $r>0.1$  were: age, location, time since diagnosis. Variables significantly correlated with head and neck cancer type with  $r>0.1$  were: gender, current anti-cancer treatment. Variable categories excluded from analysis: Non-binary/prefer not to say (gender). Abbreviations: B, unstandardized coefficient; SE, standard error; df, degrees of freedom; OR, odds ratio; 95% CI, 95% confidence interval.

**Table S6.** Linear regression analysis predicting the Oxford COVID-19 Vaccine Hesitancy Scale summary score with sociodemographic and clinical characteristics.

|                                                                                |      | Step 1              | Step 2              |                       |               |       |         |
|--------------------------------------------------------------------------------|------|---------------------|---------------------|-----------------------|---------------|-------|---------|
| Category (reference)                                                           | n    | Adj. R <sup>2</sup> | Adj. R <sup>2</sup> | Δ Adj. R <sup>2</sup> | B (SE)        | t     | p-value |
| <b>Gender (Male)</b>                                                           | 2497 | 0.023               | 0.025               | 0.002                 |               |       |         |
| Female                                                                         |      |                     |                     |                       | 0.42 (0.20)   | 2.15  | 0.03    |
| <b>Age (18–49 years)</b>                                                       | 2505 | 0.024               | 0.041               | 0.017                 |               |       |         |
| 50–69                                                                          |      |                     |                     |                       | -1.35 (0.28)  | -4.76 | <0.001  |
| ≥70                                                                            |      |                     |                     |                       | -2.08 (0.30)  | -6.87 | <0.001  |
| <b>Highest level of education (No formal /primary school/secondary school)</b> | 2504 | 0.024               | 0.027               | 0.003                 |               |       |         |
| Vocational/Trade                                                               |      |                     |                     |                       | 0.40 (0.25)   | 1.60  | 0.11    |
| University                                                                     |      |                     |                     |                       | -0.42 (0.22)  | -1.86 | 0.06    |
| <b>Annual household income (AUD&lt;50K)</b>                                    | 2508 | 0.024               | 0.027               | 0.003                 |               |       |         |
| 50–100K                                                                        |      |                     |                     |                       | -0.42 (0.26)  | -1.64 | 0.10    |
| 100K–150K                                                                      |      |                     |                     |                       | -0.16 (0.31)  | -0.52 | 0.60    |
| >150K                                                                          |      |                     |                     |                       | -0.65 (0.33)  | -1.96 | 0.05    |
| Prefer not to say                                                              |      |                     |                     |                       | 0.45 (0.29)   | 1.55  | 0.12    |
| <b>English as dominant language (Yes)</b>                                      | 2507 | 0.024               | 0.029               | 0.005                 |               |       |         |
| No                                                                             |      |                     |                     |                       | 1.22 (0.33)   | 3.69  | <0.001  |
| <b>Location (Metropolitan)</b>                                                 | 2508 | 0.024               | 0.025               | 0.001                 |               |       |         |
| Regional/rural                                                                 |      |                     |                     |                       | 0.48 (0.22)   | 2.12  | 0.034   |
| <b>Cancer Type (All other cancer types – pooled)</b>                           | 2508 |                     |                     |                       |               |       |         |
| Breast                                                                         |      | 0.024               | 0.024               | 0.00                  | 0.32 (0.20)   | 1.58  | 0.12    |
| Genitourinary                                                                  |      | 0.024               | 0.025               | 0.001                 | -0.58 (0.25)  | -2.33 | 0.02    |
| Gastrointestinal                                                               |      | 0.024               | 0.024               | 0.00                  | -0.19 (0.25)  | -0.74 | 0.46    |
| Lung                                                                           |      | 0.024               | 0.024               | 0.00                  | -0.45 (0.34)  | -1.33 | 0.18    |
| Skin                                                                           |      | 0.024               | 0.024               | 0.00                  | 0.70 (0.42)   | 1.67  | 0.10    |
| Gynecological                                                                  |      | 0.024               | 0.023               | -0.001                | 0.26 (0.46)   | 0.56  | 0.58    |
| Head and Neck                                                                  |      | 0.024               | 0.025               | 0.001                 | 0.98 (0.51)   | 1.91  | 0.06    |
| Other                                                                          |      | 0.024               | 0.023               | -0.001                | -0.14 (0.57)  | -0.25 | 0.81    |
| <b>Cancer Stage (Localized)</b>                                                | 2404 | 0.024               | 0.024               | 0.00                  |               |       |         |
| Metastatic                                                                     |      |                     |                     |                       | -0.13 (0.20)  | -0.64 | 0.52    |
| <b>Time since diagnosis (&lt;6 months)</b>                                     | 2508 | 0.024               | 0.024               | 0.00                  |               |       |         |
| 6–24 months                                                                    |      |                     |                     |                       | -0.23 (0.31)  | -0.74 | 0.46    |
| 2–5 years                                                                      |      |                     |                     |                       | -0.22 (0.31)  | -0.71 | 0.48    |
| >5 years                                                                       |      |                     |                     |                       | -0.64 (0.34)  | -1.86 | 0.062   |
| <b>Current anti-cancer treatment (Yes)</b>                                     | 2508 | 0.024               | 0.023               | -0.001                |               |       |         |
| No                                                                             |      |                     |                     |                       | -0.029 (0.20) | -0.15 | 0.88    |

**Notes:** Step 1, time since study commencement is the only predictor variable entered into the model; Step 2, the clinic-demographic is the predictor variable entered into the model. These variables were excluded due to <50 responses; Aboriginal and/or Torres Strait Islander status; non-binary/other gender, “other” educational level. Cancer stage (don’t know/other) were excluded for comparisons between localized and metastatic. Analyses were not undertaken for Aboriginal and/or Torres Strait Islander status, due to limited observations. Abbreviations: Adj. R<sup>2</sup>, Adjusted R<sup>2</sup>; B(SE), unstandardized coefficient (standard error); t, t-statistic; AUD, Australian Dollars; K, 1000.

**Table S7.** Hierarchical multivariable linear regression analysis of the Oxford COVID-19 Vaccine Hesitancy Scale score, with significantly correlated ( $r>0.1$ ) demographic and disease-related variables ( $n = 2500$ ).

| Step and predictor variable                           | B     | SE    | t     | p-value | sr    | Adj. R <sup>2</sup> | ΔAdj. R <sup>2</sup> |
|-------------------------------------------------------|-------|-------|-------|---------|-------|---------------------|----------------------|
| Step 1                                                |       |       |       |         |       | 0.024               | 0.024                |
| Constant                                              | 11.30 | 0.22  | 52.46 | <0.001  |       |                     |                      |
| <b>Time since study commencement</b>                  | -0.03 | 0.004 | -7.87 | <0.001  | -0.16 |                     |                      |
| Step 2                                                |       |       |       |         |       | 0.052               | 0.028                |
| Constant                                              | 12.72 | 0.35  | 36.76 | <0.001  |       |                     |                      |
| <b>Time since study commencement</b>                  | -0.03 | 0.004 | -6.83 | <0.001  | -0.14 |                     |                      |
| <b>Age (years)</b>                                    |       |       |       |         |       |                     |                      |
| 18–49 (reference)                                     | -     | -     | -     | -       | -     |                     |                      |
| 50–69                                                 | -1.43 | 0.28  | -5.03 | <0.001  | -0.10 |                     |                      |
| ≥70                                                   | -2.22 | 0.31  | -7.24 | <0.001  | -0.14 |                     |                      |
| <b>Highest level of education</b>                     |       |       |       |         |       |                     |                      |
| No formal/primary school/secondary school (reference) | -     | -     | -     | -       | -     |                     |                      |
| Vocational/trade qualification                        | 0.17  | 0.25  | 0.69  | 0.49    | 0.01  |                     |                      |
| University                                            | -0.81 | 0.23  | -3.61 | <0.001  | -0.07 |                     |                      |
| <b>English as dominant language</b>                   |       |       |       |         |       |                     |                      |
| Yes (reference)                                       | -     | -     | -     | -       | -     |                     |                      |
| No                                                    | 1.24  | 0.33  | 3.78  | <0.001  | 0.08  |                     |                      |

**Notes:** Variables entered into the model at each step: Step 1, time since study commencement; Step 2, age, highest level of education, English as dominant language. Variables significantly correlated ( $r>0.1$ ) with the Oxford COVID-19 Vaccine Hesitancy Scale score: age, highest level of education, English as dominant language. Variable categories excluded from analysis: Other (Highest level of education). Abbreviations: B, unstandardized coefficient; SE, standard error; t, t-statistic; sr, semipartial correlation coefficient; Adj. R<sup>2</sup>, Adjusted R<sup>2</sup>.

**Table S8.** Hierarchical multivariable linear regression analysis of the Oxford COVID-19 Vaccine Hesitancy Scale score with genitourinary cancer type, compared with all cancer types, controlling for significantly correlated ( $r>0.1$ ) demographic and disease-related variables with either the Oxford COVID-19 Vaccine Hesitancy Scale score or genitourinary cancer type (when compared with all other cancer types) ( $n = 2385$ ).

| Step and predictor variable                           | B     | SE    | t     | p-value | sr     | Adj. R <sup>2</sup> | Δ Adj. R <sup>2</sup> |
|-------------------------------------------------------|-------|-------|-------|---------|--------|---------------------|-----------------------|
| Step 1                                                |       |       |       |         |        | 0.024               | 0.024                 |
| Constant                                              | 11.24 | 0.22  | 51.16 | <0.001  |        |                     |                       |
| <b>Time since study commencement</b>                  | -0.03 | 0.004 | -7.71 | <0.001  | -0.16  |                     |                       |
| Step 2                                                |       |       |       |         |        | 0.050               | 0.026                 |
| Constant                                              | 12.55 | 0.39  | 32.61 | <0.001  |        |                     |                       |
| <b>Time since study commencement</b>                  | -0.03 | 0.004 | -6.84 | <0.001  | -0.14  |                     |                       |
| <b>Age (years)</b>                                    |       |       |       |         |        |                     |                       |
| 18–49 (reference)                                     | -     | -     | -     | -       | -      |                     |                       |
| 50–69                                                 | -1.42 | 0.29  | -4.92 | <0.001  | -0.10  |                     |                       |
| ≥70                                                   | -2.12 | 0.32  | -6.62 | <0.001  | -0.13  |                     |                       |
| <b>Gender</b>                                         |       |       |       |         |        |                     |                       |
| Male (reference)                                      | -     | -     | -     | -       | -      |                     |                       |
| Female                                                | 0.15  | 0.20  | 0.73  | 0.47    | 0.015  |                     |                       |
| <b>Highest level of education</b>                     |       |       |       |         |        |                     |                       |
| No formal/primary school/secondary school (reference) | -     | -     | -     | -       | -      |                     |                       |
| Vocational/trade qualification                        | 0.25  | 0.26  | 0.96  | 0.34    | 0.02   |                     |                       |
| University                                            | -0.74 | 0.23  | -3.23 | 0.001   | -0.07  |                     |                       |
| <b>English as dominant language</b>                   |       |       |       |         |        |                     |                       |
| Yes (reference)                                       | -     | -     | -     | -       | -      |                     |                       |
| No                                                    | 1.01  | 0.34  | 2.93  | 0.003   | 0.06   |                     |                       |
| Step 3                                                |       |       |       |         |        | 0.048               | -0.002                |
| Constant                                              | 12.79 | 0.46  | 27.78 | <0.001  |        |                     |                       |
| <b>Time since study commencement</b>                  | -0.03 | 0.004 | -6.72 | <0.001  | -0.14  |                     |                       |
| <b>Age (years)</b>                                    |       |       |       |         |        |                     |                       |
| 18–49 (reference)                                     | -     | -     | -     | -       | -      |                     |                       |
| 50–69                                                 | -1.40 | 0.29  | -4.84 | <0.001  | -0.10  |                     |                       |
| ≥70                                                   | -2.09 | 0.32  | -6.45 | <0.001  | -0.13  |                     |                       |
| <b>Gender</b>                                         |       |       |       |         |        |                     |                       |
| Male (reference)                                      | -     | -     | -     | -       | -      |                     |                       |
| Female                                                | 0.10  | 0.24  | 0.43  | 0.67    | 0.01   |                     |                       |
| <b>Highest level of education</b>                     |       |       |       |         |        |                     |                       |
| No formal/primary school/secondary school (reference) | -     | -     | -     | -       | -      |                     |                       |
| Vocational/trade qualification                        | 0.25  | 0.26  | 0.97  | 0.33    | 0.02   |                     |                       |
| University                                            | -0.73 | 0.23  | -3.16 | 0.002   | -0.07  |                     |                       |
| <b>English as dominant language</b>                   |       |       |       |         |        |                     |                       |
| Yes (reference)                                       | -     | -     | -     | -       | -      |                     |                       |
| No                                                    | 1.00  | 0.35  | 2.90  | 0.004   | 0.06   |                     |                       |
| <b>Genitourinary cancer type</b>                      | -0.11 | 0.30  | -0.35 | 0.73    | -0.007 |                     |                       |
| <b>Time since diagnosis</b>                           |       |       |       |         |        |                     |                       |
| <6 months (reference)                                 | -     | -     | -     | -       | -      |                     |                       |
| 6–24 months                                           | -0.29 | 0.31  | -0.94 | 0.35    | -0.02  |                     |                       |

|                       |       |      |       |      |       |  |  |
|-----------------------|-------|------|-------|------|-------|--|--|
| 2–5 years             | -0.24 | 0.32 | -0.76 | 0.45 | -0.02 |  |  |
| >5 years              | -0.33 | 0.35 | -0.92 | 0.36 | -0.02 |  |  |
| <b>Cancer stage</b>   |       |      |       |      |       |  |  |
| Localized (reference) | -     | -    | -     | -    | -     |  |  |
| Metastatic            | 0.02  | 0.21 | 0.08  | 0.94 | 0.002 |  |  |

**Notes:** Variables entered into the model at each step: Step 1, time since study commencement; Step 2, age, gender, highest level of education, English as dominant language; Step 3, genitourinary cancer type, time since diagnosis, cancer stage. Variables significantly correlated ( $r>0.1$ ) with the Oxford COVID-19 Vaccine Hesitancy Scale score: age, highest level of education, English as dominant language. Variables significantly correlated ( $r>0.1$ ) with genitourinary cancer type: age, gender, time since diagnosis, cancer stage. Variable categories excluded from analysis: Non-binary/prefer not to say (gender); other (highest educational level); don't know/not applicable/other (cancer stage). Abbreviations: B, unstandardized coefficient; SE, standard error; t, t-statistic; sr, semipartial correlation coefficient; Adj.  $R^2$ , Adjusted  $R^2$ .

**Table S9.** Linear regression predicting the Disease Influenced Vaccine Acceptance Scale-Six (DIVAS-6) Disease Complacency subscale score with sociodemographic and clinical characteristics.

|                                                                                |      | Step 1              | Step 2              |                       |              |       |         |
|--------------------------------------------------------------------------------|------|---------------------|---------------------|-----------------------|--------------|-------|---------|
| Category (reference)                                                           | n    | Adj. R <sup>2</sup> | Adj. R <sup>2</sup> | Δ Adj. R <sup>2</sup> | B (SE)       | t     | p-value |
| <b>Gender (Male)</b>                                                           | 2524 | 0.009               | 0.012               | 0.003                 |              |       |         |
| Female                                                                         |      |                     |                     |                       | -0.34 (0.12) | -2.76 | 0.01    |
| <b>Age (18–49 years)</b>                                                       | 2532 | 0.009               | 0.01                | 0.001                 |              |       |         |
| 50–69                                                                          |      |                     |                     |                       | 0.21 (0.18)  | 1.20  | 0.23    |
| ≥70                                                                            |      |                     |                     |                       | 0.40 (0.19)  | 2.08  | 0.04    |
| <b>Highest level of education (No formal /primary school/secondary school)</b> | 2529 | 0.009               | 0.008               | -0.001                |              |       |         |
| Vocational/Trade                                                               |      |                     |                     |                       | -0.04 (0.16) | -0.28 | 0.78    |
| University                                                                     |      |                     |                     |                       | -0.11 (0.14) | -0.78 | 0.44    |
| <b>Annual household income (AUD&lt;50K)</b>                                    | 2535 | 0.009               | 0.009               | 0.00                  |              |       |         |
| 50K–100K                                                                       |      |                     |                     |                       | -0.09 (0.16) | -0.57 | 0.57    |
| 100K–150K                                                                      |      |                     |                     |                       | -0.22 (0.19) | -1.13 | 0.26    |
| >150K                                                                          |      |                     |                     |                       | 0.02 (0.21)  | 0.11  | 0.91    |
| Prefer not to say                                                              |      |                     |                     |                       | 0.18 (0.18)  | 1.01  | 0.31    |
| <b>English as dominant language (Yes)</b>                                      | 2534 | 0.009               | 0.009               | 0.00                  |              |       |         |
| No                                                                             |      |                     |                     |                       | -0.05 (0.21) | -0.25 | 0.81    |
| <b>Location (Metropolitan)</b>                                                 | 2535 | 0.009               | 0.009               | 0.00                  |              |       |         |
| Regional/rural                                                                 |      |                     |                     |                       | -0.01 (0.14) | -0.05 | 0.96    |
| <b>Cancer Type (All other cancer types – pooled)</b>                           | 2535 |                     |                     |                       |              |       |         |
| Breast                                                                         |      | 0.009               | 0.01                | 0.001                 | -0.18 (0.13) | -1.45 | 0.15    |
| Genitourinary                                                                  |      | 0.009               | 0.015               | 0.006                 | 0.60 (0.15)  | 3.88  | <0.001  |
| Gastrointestinal                                                               |      | 0.009               | 0.01                | 0.001                 | -0.30 (0.16) | -1.92 | 0.06    |
| Lung                                                                           |      | 0.009               | 0.014               | 0.005                 | -0.74 (0.21) | -3.54 | <0.001  |
| Skin                                                                           |      | 0.009               | 0.01                | 0.001                 | 0.46 (0.27)  | 1.72  | 0.09    |
| Gynecological                                                                  |      | 0.009               | 0.009               | 0.00                  | -0.15 (0.28) | -0.55 | 0.58    |
| Head and Neck                                                                  |      | 0.009               | 0.01                | 0.001                 | 0.53 (0.32)  | 1.67  | 0.10    |
| Other                                                                          |      | 0.009               | 0.011               | 0.002                 | 0.75 (0.35)  | 2.11  | 0.04    |
| <b>Cancer Stage (Localized)</b>                                                | 2426 | 0.009               | 0.017               | 0.008                 |              |       |         |
| Metastatic                                                                     |      |                     |                     |                       | -0.59 (0.13) | -4.66 | <0.001  |
| <b>Time since diagnosis (&lt;6 months)</b>                                     | 2535 | 0.009               | 0.008               | -0.001                |              |       |         |
| 6–24 months                                                                    |      |                     |                     |                       | -0.05 (0.19) | -0.25 | 0.80    |
| 2–5 years                                                                      |      |                     |                     |                       | -0.05 (0.20) | -0.24 | 0.81    |
| >5 years                                                                       |      |                     |                     |                       | 0.07 (0.21)  | 0.34  | 0.73    |
| <b>Current anti-cancer treatment (Yes)</b>                                     | 2535 | 0.009               | 0.016               | 0.007                 |              |       |         |
| No                                                                             |      |                     |                     |                       | 0.51 (0.12)  | 4.19  | <0.001  |

**Notes:** Step 1 = time since study commencement is the only predictor variable entered into the model; Step 2 = the clinic-demographic is the predictor variable entered into the model. These variables were excluded due to <50 responses; Aboriginal and/or Torres Strait Islander status; non-binary/other gender, “other” educational level. Cancer stage (don’t know/other) were excluded for comparisons between localized and metastatic. Abbreviations: Adj. R<sup>2</sup>, Adjusted R<sup>2</sup>; B(SE), unstandardized coefficient (standard error); t, t-statistic; AUD, Australian Dollars; K, 1000.

**Table S10.** Linear regression predicting the Disease Influenced Vaccine Acceptance Scale-Six (DIVAS-6) Vaccine Vulnerability subscale score with sociodemographic and clinical characteristics.

|                                                                                    |      | Step 1              | Step 2              |                       |              |       |         |
|------------------------------------------------------------------------------------|------|---------------------|---------------------|-----------------------|--------------|-------|---------|
| Category (reference)                                                               | n    | Adj. R <sup>2</sup> | Adj. R <sup>2</sup> | Δ Adj. R <sup>2</sup> | B (SE)       | t     | p-value |
| <b>Gender (Male)</b>                                                               | 2316 | 0.005               | 0.015               | 0.01                  |              |       |         |
| Female                                                                             |      |                     |                     |                       | 0.74 (0.15)  | 5.02  | <0.001  |
| <b>Age (18–49 years)</b>                                                           | 2325 | 0.005               | 0.03                | 0.025                 |              |       |         |
| 50–69                                                                              |      |                     |                     |                       | -0.69 (0.21) | -3.31 | 0.001   |
| ≥70                                                                                |      |                     |                     |                       | -1.65 (0.23) | -7.28 | <0.001  |
| <b>Highest level of education<br/>(No formal /primary school/secondary school)</b> | 2324 | 0.005               | 0.015               | 0.01                  |              |       |         |
| Vocational/Trade                                                                   |      |                     |                     |                       | 0.05 (0.19)  | 0.28  | 0.78    |
| University                                                                         |      |                     |                     |                       | -0.73 (0.17) | -4.32 | <0.001  |
| <b>Annual household income (AUD&lt;50K)</b>                                        | 2328 | 0.005               | 0.017               | 0.012                 |              |       |         |
| 50-100K                                                                            |      |                     |                     |                       | -0.38 (0.20) | -1.96 | 0.05    |
| 100K-150K                                                                          |      |                     |                     |                       | 0.07 (0.23)  | 0.32  | 0.75    |
| >150K                                                                              |      |                     |                     |                       | -0.74 (0.25) | -3.00 | 0.003   |
| Prefer not to say                                                                  |      |                     |                     |                       | 0.67 (0.22)  | 3.03  | 0.002   |
| <b>English as dominant language (Yes)</b>                                          | 2327 | 0.005               | 0.017               | 0.012                 |              |       |         |
| No                                                                                 |      |                     |                     |                       | 1.36 (0.25)  | 5.38  | <0.001  |
| <b>Location (Metropolitan)</b>                                                     | 2328 | 0.005               | 0.005               | 0.00                  |              |       |         |
| Regional/rural                                                                     |      |                     |                     |                       | 0.14 (0.17)  | 0.79  | 0.43    |
| <b>Cancer Type (All other cancer types – pooled)</b>                               | 2328 |                     |                     |                       |              |       |         |
| Breast                                                                             |      | 0.005               | 0.005               | 0.00                  | 0.15 (0.15)  | 0.98  | 0.33    |
| Genitourinary                                                                      |      | 0.005               | 0.017               | 0.012                 | -1.00 (0.19) | -5.36 | <0.001  |
| Gastrointestinal                                                                   |      | 0.005               | 0.007               | 0.002                 | 0.41 (0.19)  | 2.17  | 0.03    |
| Lung                                                                               |      | 0.005               | 0.007               | 0.002                 | 0.58 (0.26)  | 2.25  | 0.03    |
| Skin                                                                               |      | 0.005               | 0.005               | 0.00                  | -0.27 (0.32) | -0.83 | 0.40    |
| Gynecological                                                                      |      | 0.005               | 0.007               | 0.002                 | 0.87 (0.36)  | 2.43  | 0.02    |
| Head and Neck                                                                      |      | 0.005               | 0.006               | 0.001                 | -0.50 (0.40) | -1.26 | 0.21    |
| Other                                                                              |      | 0.005               | 0.005               | 0.00                  | 0.16 (0.44)  | 0.37  | 0.71    |
| <b>Cancer Stage (Localized)</b>                                                    | 2237 | 0.004               | 0.011               | 0.007                 |              |       |         |
| Metastatic                                                                         |      |                     |                     |                       | 0.62 (0.15)  | 4.05  | <0.001  |
| <b>Time since cancer diagnosis (&lt;6 months)</b>                                  |      | 0.005               | 0.016               | 0.011                 |              |       |         |
| 6–24 months                                                                        |      |                     |                     |                       | -0.43 (0.23) | -1.89 | 0.06    |
| 2–5 years                                                                          |      |                     |                     |                       | -0.75 (0.24) | -3.15 | 0.002   |
| >5 years                                                                           |      |                     |                     |                       | -1.25 (0.26) | -4.84 | <0.001  |
| <b>Current anti-cancer treatment (Yes)</b>                                         | 2328 | 0.005               | 0.017               | 0.012                 |              |       |         |
| No                                                                                 |      |                     |                     |                       | -0.79 (0.15) | -5.33 | <0.001  |

**Notes:** Step 1 = time since study commencement is the only predictor variable entered into the model; Step 2 = the clinic-demographic is the predictor variable entered into the model. These variables were excluded due to <50 responses; Aboriginal and/or Torres Strait Islander status; non-binary/other gender, “other” educational level. Cancer stage (don’t know/other) were excluded for comparisons between localized and metastatic. Abbreviations: Adj. R<sup>2</sup>, Adjusted R<sup>2</sup>; B(SE), unstandardized coefficient (standard error); t, t-statistic; AUD, Australian Dollars; K, 1000.

**Table S11.** Hierarchical multivariable linear regression of the DIVAS-6 Disease Complacency subscale score with genitourinary cancer type, compared with all other cancer types, controlling for significantly correlated ( $r>0.1$ ) demographic and disease-related variables with either DIVAS-6 Disease Complacency subscale score or genitourinary cancer type (when compared with all other cancer types) ( $n = 2412$ ).

| Step and predictor variable          | B     | SE    | t     | p-value | sr     | Adj. R <sup>2</sup> | Δ Adj. R <sup>2</sup> |
|--------------------------------------|-------|-------|-------|---------|--------|---------------------|-----------------------|
| Step 1                               |       |       |       |         |        | 0.009               | 0.009                 |
| Constant                             | 6.95  | 0.14  | 50.29 | <0.001  |        |                     |                       |
| <b>Time since study commencement</b> | -0.01 | 0.002 | -4.68 | <0.001  | -0.10  |                     |                       |
| Step 2                               |       |       |       |         |        | 0.011               | 0.002                 |
| Constant                             | 6.96  | 0.22  | 31.62 | <0.001  |        |                     |                       |
| <b>Time since study commencement</b> | -0.01 | 0.002 | -4.74 | <0.001  | -0.10  |                     |                       |
| <b>Age (years)</b>                   |       |       |       |         |        |                     |                       |
| 18–49 (reference)                    | -     | -     | -     | -       | -      |                     |                       |
| 50–69                                | 0.16  | 0.18  | 0.89  | 0.38    | 0.02   |                     |                       |
| ≥70                                  | 0.29  | 0.20  | 1.45  | 0.15    | 0.03   |                     |                       |
| <b>Gender</b>                        |       |       |       |         |        |                     |                       |
| Male (reference)                     | -     | -     | -     | -       | -      |                     |                       |
| Female                               | -0.31 | 0.13  | -2.34 | 0.02    | -0.05  |                     |                       |
| Step 3                               |       |       |       |         |        | 0.026               | 0.015                 |
| Constant                             | 7.09  | 0.28  | 25.73 | <0.001  |        |                     |                       |
| <b>Time since study commencement</b> | -0.01 | 0.002 | -5.17 | <0.001  | -0.10  |                     |                       |
| <b>Age (years)</b>                   |       |       |       |         |        |                     |                       |
| 18–49 (reference)                    | -     | -     | -     | -       | -      |                     |                       |
| 50–69                                | 0.20  | 0.18  | 1.10  | 0.27    | 0.02   |                     |                       |
| ≥70                                  | 0.28  | 0.20  | 1.38  | 0.17    | 0.03   |                     |                       |
| <b>Gender</b>                        |       |       |       |         |        |                     |                       |
| Male (reference)                     | -     | -     | -     | -       | -      |                     |                       |
| Female                               | -0.19 | 0.15  | -1.22 | 0.22    | -0.02  |                     |                       |
| <b>Genitourinary cancer type</b>     | 0.61  | 0.19  | 3.15  | 0.002   | 0.06   |                     |                       |
| <b>Time since diagnosis</b>          |       |       |       |         |        |                     |                       |
| <6 months (reference)                | -     | -     | -     | -       | -      |                     |                       |
| 6–24 months                          | -0.02 | 0.20  | -0.10 | 0.92    | -0.002 |                     |                       |
| 2–5 years                            | 0.005 | 0.20  | 0.02  | 0.98    | 0.00   |                     |                       |
| >5 years                             | 0.06  | 0.23  | 0.28  | 0.78    | 0.006  |                     |                       |
| <b>Cancer stage</b>                  |       |       |       |         |        |                     |                       |
| Localized (reference)                | -     | -     | -     | -       | -      |                     |                       |
| Metastatic                           | -0.74 | 0.13  | -5.66 | <0.001  | -0.11  |                     |                       |

**Notes:** Variables entered into the model at each step: Step 1, time since study commencement; Step 2, age, gender; Step 3, genitourinary cancer type, time since diagnosis, cancer stage. Variables significantly correlated ( $r>0.1$ ) with the DIVAS-6 Disease Complacency subscale score: Nil. Variables significantly correlated ( $r>0.1$ ) with genitourinary cancer type: age, gender, time since diagnosis, cancer stage. Variable categories excluded from analysis: Non-binary/prefer not to say (gender); don't know/not applicable/other (cancer stage). Abbreviations: B, unstandardized coefficient; SE, standard error; t, t-statistic; sr, semipartial correlation coefficient; Adj. R<sup>2</sup>, Adjusted R<sup>2</sup>.

**Table S12.** Hierarchical multivariable linear regression analysis of the DIVAS-6 Vaccine Vulnerability subscale score with genitourinary cancer type, compared with all other cancer types, controlling for significantly correlated ( $r>0.1$ ) demographic and disease-related variables with either DIVAS-6 Vaccine Vulnerability subscale score or genitourinary cancer type (when compared with all other cancer types) ( $n = 2221$ ).

|                                      | <b>B</b> | <b>SE</b> | <b>t</b> | <b>p-value</b> | <b>sr</b> | <b>Adj. R<sup>2</sup></b> | <b>Δ Adj. R<sup>2</sup></b> |
|--------------------------------------|----------|-----------|----------|----------------|-----------|---------------------------|-----------------------------|
| Step 1                               |          |           |          |                |           | 0.004                     | 0.004                       |
| Constant                             | 8.74     | 0.17      | 52.66    | <0.001         |           |                           |                             |
| <b>Time since study commencement</b> | -0.01    | 0.003     | -3.13    | 0.002          | -0.07     |                           |                             |
| Step 2                               |          |           |          |                |           | 0.041                     | 0.037                       |
| Constant                             | 8.93     | 0.26      | 34.16    | <0.001         |           |                           |                             |
| <b>Time since study commencement</b> | -0.006   | 0.003     | -2.23    | 0.03           | -0.05     |                           |                             |
| <b>Age (years)</b>                   |          |           |          |                |           |                           |                             |
| 18–49 (reference)                    | -        | -         | -        | -              | -         |                           |                             |
| 50–69                                | -0.55    | 0.21      | -2.58    | 0.01           | -0.05     |                           |                             |
| ≥70                                  | -1.40    | 0.24      | -5.88    | <0.001         | -0.12     |                           |                             |
| <b>Gender</b>                        |          |           |          |                |           |                           |                             |
| Male (reference)                     | -        | -         | -        | -              | -         |                           |                             |
| Female                               | 0.48     | 0.16      | 3.08     | 0.002          | 0.06      |                           |                             |
| <b>English as dominant language</b>  |          |           |          |                |           |                           |                             |
| Yes (reference)                      | -        | -         | -        | -              | -         |                           |                             |
| No                                   | 1.17     | 0.26      | 4.46     | <0.001         | 0.09      |                           |                             |
| Step 3                               |          |           |          |                |           | 0.068                     | 0.037                       |
| Constant                             | 9.40     | 0.33      | 28.52    | <0.001         |           |                           |                             |
| <b>Time since study commencement</b> | -0.004   | 0.003     | -1.55    | 0.12           | -0.03     |                           |                             |
| <b>Age (years)</b>                   |          |           |          |                |           |                           |                             |
| 18–49 (reference)                    | -        | -         | -        | -              | -         |                           |                             |
| 50–69                                | -0.55    | 0.21      | -2.64    | 0.008          | -0.05     |                           |                             |
| ≥70                                  | -1.34    | 0.24      | -5.69    | <0.001         | -0.12     |                           |                             |
| <b>Gender</b>                        |          |           |          |                |           |                           |                             |
| Male (reference)                     |          |           |          |                |           |                           |                             |
| Female                               | 0.33     | 0.18      | 1.84     | 0.07           | 0.04      |                           |                             |
| <b>English as dominant language</b>  |          |           |          |                |           |                           |                             |
| Yes (reference)                      | -        | -         | -        | -              | -         |                           |                             |
| No                                   | 1.07     | 0.26      | 4.13     | <0.001         | 0.09      |                           |                             |
| <b>Genitourinary cancer type</b>     | -0.55    | 0.23      | -2.43    | 0.02           | -0.05     |                           |                             |
| <b>Time since diagnosis</b>          |          |           |          |                |           |                           |                             |
| <6 months (reference)                | -        | -         | -        | -              | -         |                           |                             |
| 6–24 months                          | -0.28    | 0.23      | -1.20    | 0.23           | -0.03     |                           |                             |
| 2–5 years                            | -0.57    | 0.24      | -2.37    | 0.02           | -0.05     |                           |                             |
| >5 years                             | -0.96    | 0.27      | -3.61    | <0.001         | -0.07     |                           |                             |
| <b>Cancer stage</b>                  |          |           |          |                |           |                           |                             |
| Localized (reference)                | -        | -         | -        | -              | -         |                           |                             |
| Metastatic                           | 0.80     | 0.16      | 4.95     | <0.001         | 0.10      |                           |                             |
| <b>Current anti-cancer treatment</b> |          |           |          |                |           |                           |                             |
| Yes (reference)                      | -        | -         | -        | -              | -         |                           |                             |
| No                                   | -0.56    | 0.16      | -3.56    | <0.001         | -0.07     |                           |                             |

**Notes:** Variables entered into the model at each step: Step 1, time since study commencement; Step 2, age, gender, English as dominant language; Step 3, genitourinary cancer type, time since diagnosis, cancer stage, current anti-cancer treatment. Variables significantly correlated ( $r>0.1$ ) with DIVAS-6 Vaccine Vulnerability subscale: age, gender, English as dominant language, time since diagnosis, cancer stage, current anti-cancer treatment. Variables significantly correlated ( $r>0.1$ ) with genitourinary cancer type: age, gender, time since diagnosis, cancer stage. Variable categories excluded from analysis: Non-binary/prefer not to say (gender); don't know/not applicable/other (cancer stage). Abbreviations: B, unstandardized coefficient; SE, standard error; t, t-statistic; sr, semipartial correlation coefficient; Adj.  $R^2$ , Adjusted  $R^2$ .
